# Supplementary material
Source: bioRxiv or medRxiv preprint supplement (https://www.medrxiv.org/highwire/filestream/93798/field_highwire_adjunct_files/4/2020.05.09.20096511-5.pdf)

Supplementary Figure 3: Heatmap of cluster markers used to identify cell types in COV

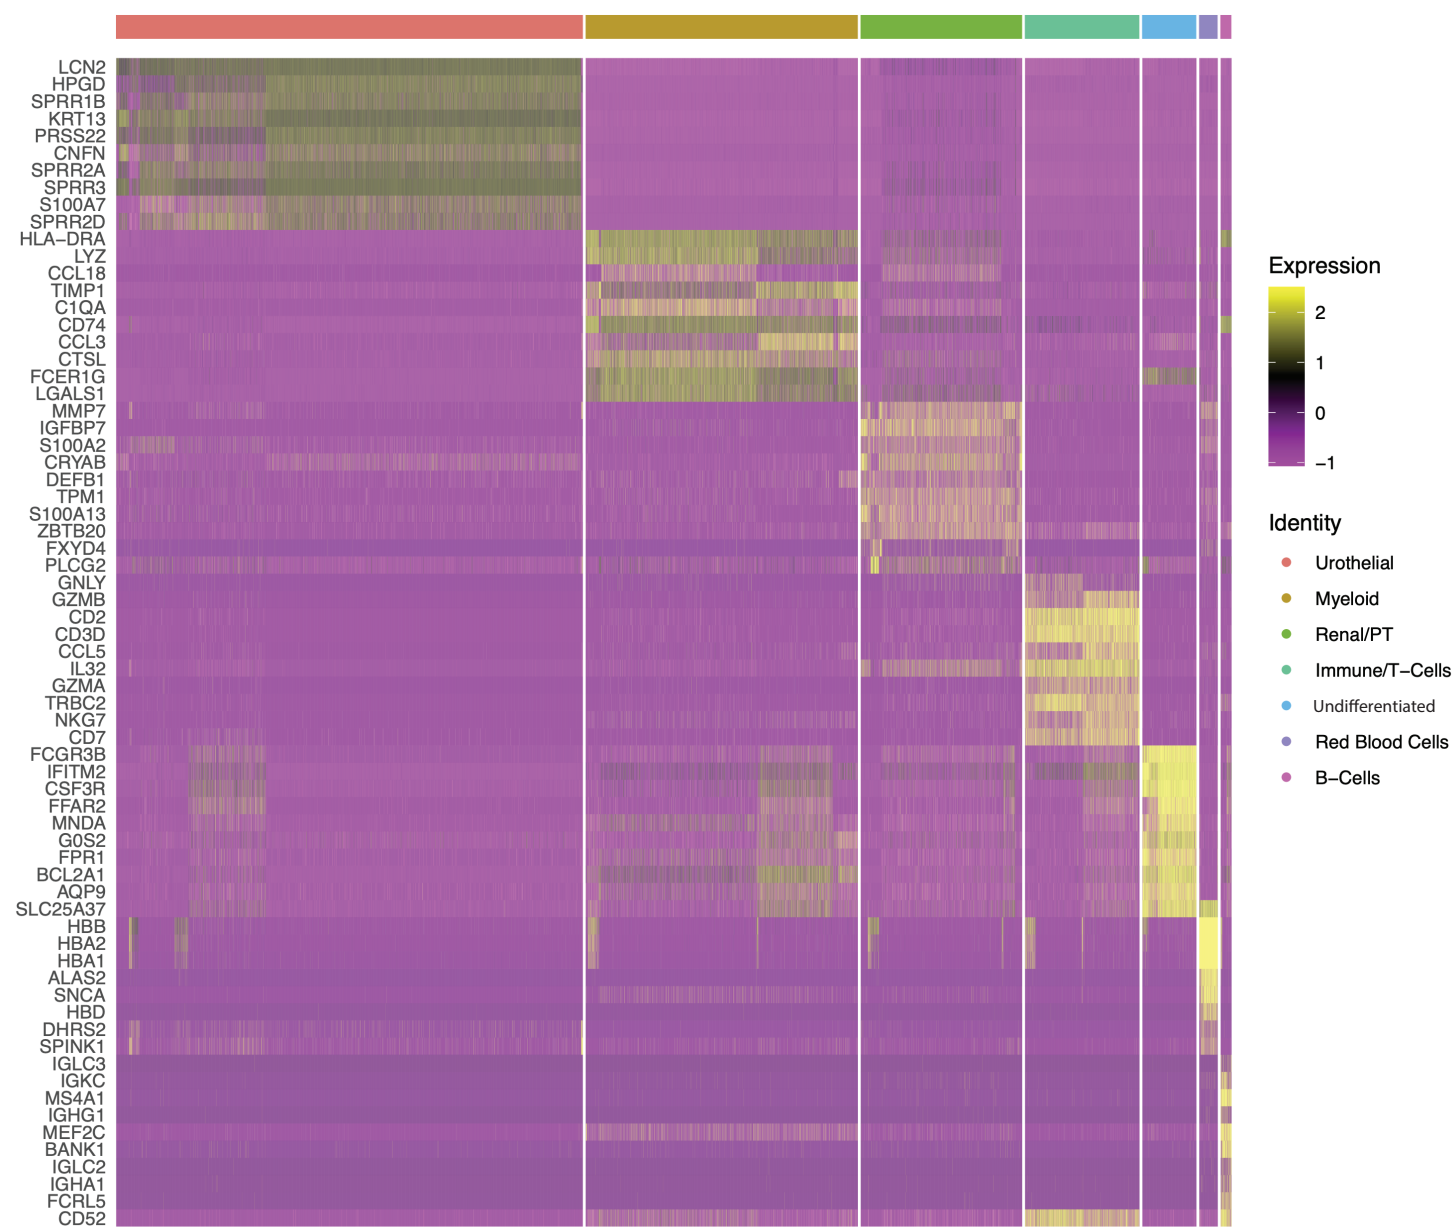

Supplement: Supplementary file [file 2020.05.09.20096511-5.pdf]
